# Supplementary material for: Elimination of p19ARF-expressing cells enhances pulmonary function in mice
Source: JCI journal article supplement (doi:10.1172/jci.insight.87732), 2016-08-03
Supplement: sd1 [file 1]

## Supplemental Data

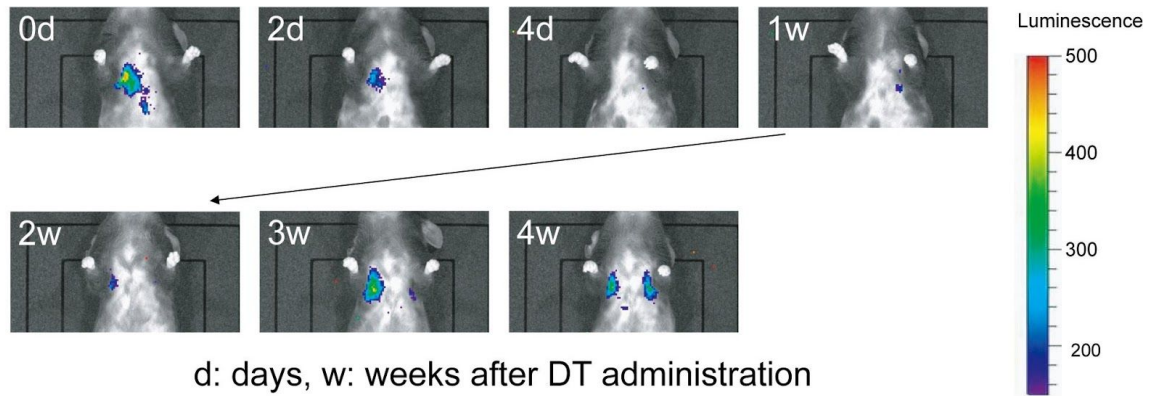

**Supplemental Figure 1. Effects of DT on luciferase expression in lungs.** Twelve-month-old female ARF-DTR mice were intraperitoneally injected with DT. Luciferase activity was monitored using an *in vivo* imaging system at the indicated time points following the DT injection.

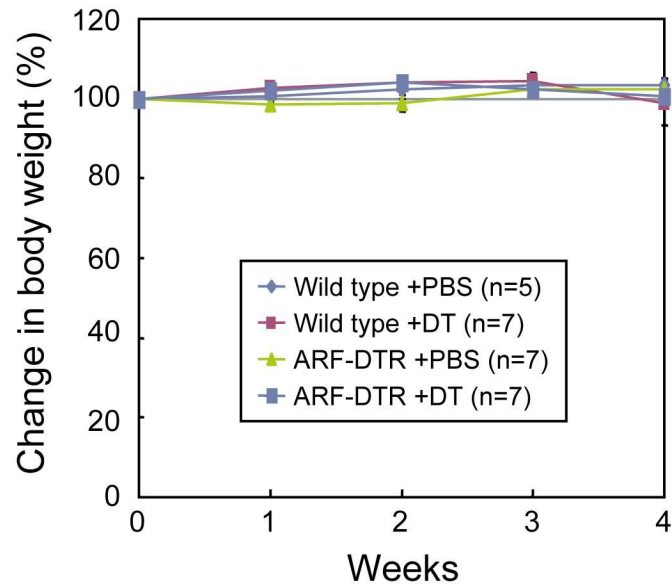

**Supplemental Figure 2. The DT treatment had no effect on body weight.** Twelve-month-old female mice (wild type and ARF-DTR) were administrated DT, as depicted in Figure 4A. The body weights of these mice were monitored every week following the initial DT injection. Changes in body weight in each mouse after the DT injection were calculated. Values represent means  $\pm$  SEM of the indicated experiments.

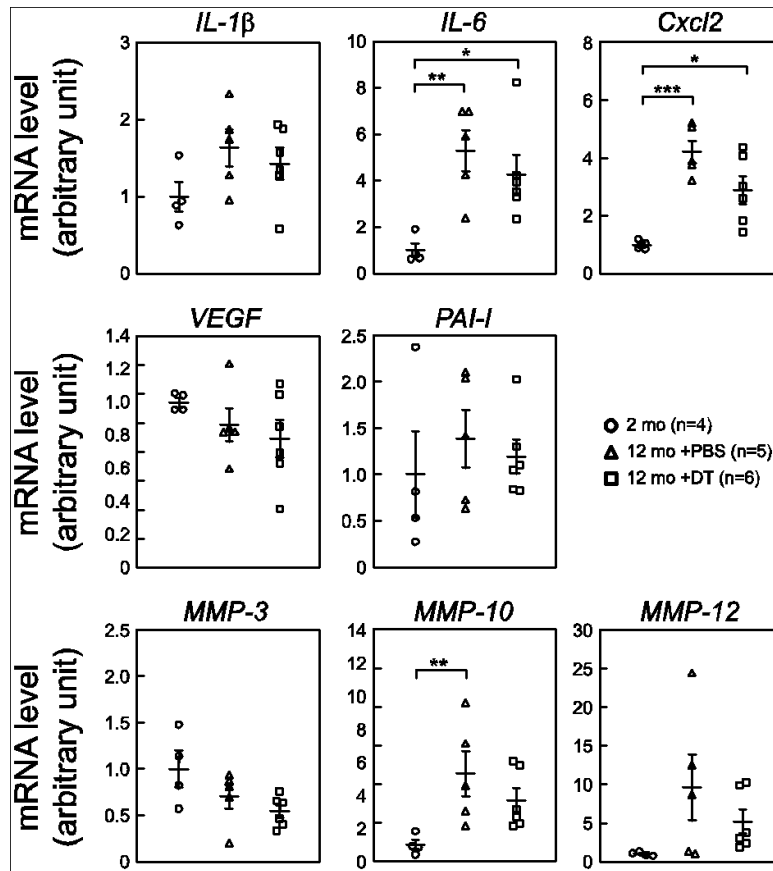

**Supplemental Figure 3. The DT treatment did not alter the expression of senescence-associated genes in wild-type mice.** Total RNA was extracted from the lungs of female wild-type mice treated with PBS or DT. The expression of the indicated genes was analyzed by real-time PCR. Values represent means  $\pm$  SEM of independent experiments. Data were analyzed one-way ANOVA followed by post hoc Tukey-Kramer multiple comparison test. \* $P < 0.05$ ; \*\* $P < 0.01$ ; \*\*\* $P < 0.001$ .

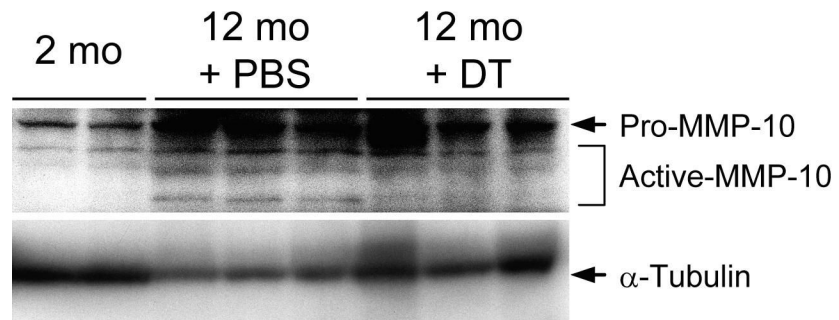

**Supplemental Figure 4. MMP-10 expression in ARF-DTR mouse lungs.** Lysates prepared from ARF-DTR mouse lungs were analyzed for the expression of MMP-10 by immunoblotting.  $\alpha$ -Tubulin was used as a loading control.
